# Supplementary material for: Long-Term Efficacy and Safety of Bimekizumab and Other Biologics in Moderate to Severe Plaque Psoriasis: Updated Systematic Literature Review and Network Meta-analysis
Source: PubMed Central journal article supplement — Dermatol Ther (Heidelb). 2024 Nov 1;14(11):3133–47. doi: 10.1007/s13555-024-01302-0 (PMC11557745; doi:10.1007/s13555-024-01302-0), 2024-11-01
Supplement: 13555_2024_1302_MOESM1_ESM.pdf [file 13555_2024_1302_MOESM1_ESM.pdf]

## **Long-term Efficacy and Safety of Bimekizumab and Other Biologics in Moderate to Severe Plaque Psoriasis: Updated Systematic Literature Review and Network Meta-Analysis**

Richard B. Warren,<sup>1</sup> Kerry Donnelly,<sup>2</sup> Sandeep Kiri,<sup>2</sup> Vanessa Taieb,<sup>3</sup> Mahmoud Slim,<sup>4,5</sup> Kyle Fahrbach,<sup>6</sup> Binod Neupane,<sup>4</sup> Marissa Betts,<sup>6</sup> April Armstrong<sup>7</sup>

<sup>1</sup> Dermatology Centre, Northern Care Alliance NHS Foundation Trust, Manchester, UK; 2 NIHR Manchester Biomedical Research Centre, Manchester University NHS Foundation Trust, Manchester Academic Health Science Centre, Manchester, UK

<sup>2</sup> UCB Pharma, Slough, UK

<sup>3</sup> UCB Pharma, Colombes, France

<sup>4</sup> Evidera Inc, St-Laurent, Canada

<sup>5</sup> Institute of Neurosciences “Federico Olóriz”, University of Granada, Granada, Spain

<sup>6</sup> Evidera Inc, Waltham, Massachusetts USA

<sup>7</sup> University of California Los Angeles (UCLA), Los Angeles, California USA

### **Corresponding Author:**

April Armstrong, MD MPH

Professor and Chief

Division of Dermatology

University of California Los Angeles (UCLA), Los Angeles, California, USA

E-mail: [aprilarmstrong@post.harvard.edu](mailto:aprilarmstrong@post.harvard.edu)

# Supplementary Materials

## Supplementary Tables

Supplementary Table 1. SLR Search Strategy Embase via Ovid

| #  | Search Strings                                                                                                                                             |
|----|------------------------------------------------------------------------------------------------------------------------------------------------------------|
| 1  | exp psoriasis/                                                                                                                                             |
| 2  | (psoria\$ or palmoplantar\$ pustulosis or pustulosis palmaris et plantaris).ti,ab                                                                          |
| 3  | or/1-2                                                                                                                                                     |
| 4  | exp methotrexate/                                                                                                                                          |
| 5  | (methotrexate\$ or amethopterin or mtx or mexate).ti,ab.                                                                                                   |
| 6  | exp cyclosporine/                                                                                                                                          |
| 7  | (Ciclosporin or cyclosporine or cyclosporin).ti,ab.                                                                                                        |
| 8  | exp etretin/                                                                                                                                               |
| 9  | (acitretin or soriatane or neotigason).ti,ab.                                                                                                              |
| 10 | exp certolizumab pegol/                                                                                                                                    |
| 11 | (certolizumab pegol or cimzia or CDP870 or CDP 870).ti,ab.                                                                                                 |
| 12 | exp adalimumab/                                                                                                                                            |
| 13 | (adalimumab\$ or humira or d2e7).ti,ab.                                                                                                                    |
| 14 | exp etanercept/                                                                                                                                            |
| 15 | (etanercept\$ or enbrel or embrel or benepali).ti,ab.                                                                                                      |
| 16 | exp brodalumab/                                                                                                                                            |
| 17 | (brodalumab or siliq or kyntheum or KHK4827 or KHK 4827 or AMG 827 or AMG827).ti,ab.                                                                       |
| 18 | exp ixekizumab/                                                                                                                                            |
| 19 | (ixekizumab or taltz or ly2439821 or ly 2439821).ti,ab.                                                                                                    |
| 20 | exp secukinumab/                                                                                                                                           |
| 21 | (secukinumab or cosentyx or ain457 or ain 457).ti,ab.                                                                                                      |
| 22 | exp guselkumab/                                                                                                                                            |
| 23 | (guselkumab or tremfya or cnto 1959 or cnto1959).ti,ab.                                                                                                    |
| 24 | exp ustekinumab/                                                                                                                                           |
| 25 | (ustekinumab or stelara or cnto 1275 or cnto1275).ti,ab.                                                                                                   |
| 26 | exp tildrakizumab/                                                                                                                                         |
| 27 | (tildrakizumab or Ilumya or Ilumetri or mk 3222 or mk3222 or sch 900222 or sch900222).ti,ab.                                                               |
| 38 | exp risankizumab/                                                                                                                                          |
| 29 | (risankizumab or bi 655066 or bi655066 or "abbv 066" or abbv066).ti,ab.                                                                                    |
| 30 | exp bimekizumab/                                                                                                                                           |
| 31 | (bimekizumab or UCB4940 or UCB 4940).ti,ab.                                                                                                                |
| 32 | exp infliximab/                                                                                                                                            |
| 33 | (infliximab or remicade or renflexis or inflectra or ca2).ti,ab.                                                                                           |
| 34 | (apremilast or otezla or cc-10004 or cc 10004 or cc10004).ti,ab.                                                                                           |
| 35 | exp fumaric acid dimethyl ester/                                                                                                                           |
| 36 | (dimethyl fumarate or dimethylfumarate or bg 0012 or bg00012 or bg-00012 or tecfidera or fag201 or fag 201 or fag-201 or fumaderm or bg12 or bg-12).ti,ab. |
| 37 | exp interleukin 23p19/                                                                                                                                     |
| 38 | (interleukin 23p19 or interleukin23p19 or interleukin-23p19 or IL-23p19 or IL-23 p19).ti,ab.                                                               |

| #   | Search Strings                     |
|-----|------------------------------------|
| 39  | or/4-38                            |
| 40* | exp randomized controlled trial/   |
| 41  | exp RANDOMIZATION/                 |
| 42* | random*.ti,ab.                     |
| 43  | 'rct'.ti,ab.                       |
| 44  | 'controlled trial'.ti,ab.          |
| 45* | 'clinical trial'.ti,ab.            |
| 46* | 'trial'.ti,ab.                     |
| 47* | exp Single Blind Procedure/        |
| 48* | exp Double Blind Procedure/        |
| 49* | exp Crossover Procedure/           |
| 50* | 'cross over'.ti,ab.                |
| 51* | 'crossover'.ti,ab.                 |
| 52* | exp PLACEBO/                       |
| 53* | 'placebo'.ti,ab.                   |
| 54  | (doubl* and blind*).ti,ab.         |
| 55  | (singl* and blind*).ti,ab.         |
| 56  | ('open' and label*).ti,ab.         |
| 57* | factorial*.ti,ab.                  |
| 58* | assign*.ti,ab.                     |
| 59* | allocate*.ti,ab.                   |
| 60* | volunteer*.ti,ab.                  |
| 61  | 'controlled study'.ti,ab.          |
| 62  | 'major clinical study'.ti,ab.      |
| 63  | 'clinical article'.ti,ab.          |
| 64  | or/40-63                           |
| 65  | 3 and 39 and 64                    |
| 66* | animal/ not human/                 |
| 67  | nonhuman/                          |
| 68  | exp animal experiment/             |
| 69  | exp experimental animal/           |
| 70  | animal model/                      |
| 71  | exp rodent/                        |
| 72  | (rat or rats or mouse or mice).ti. |
| 73  | or/66-72                           |
| 74  | 65 not 73                          |
| 75  | limit 74 to english language       |
| 76  | limit 75 to abstracts              |
| 77  | 'conference abstract'.pt.          |
| 78  | limit 77 to yr="1966 - 2019"       |
| 79  | 76 not 78                          |

\*Search strategy adapted based on Cochrane Handbook for maximising search sensitivity and precision for interventions [40].

**Supplementary Table 2. SLR Search Strategy MEDLINE and MEDLINE In-process via Ovid**

| #   | Search Strings                                                                                                                                             |
|-----|------------------------------------------------------------------------------------------------------------------------------------------------------------|
| 1   | exp Psoriasis/                                                                                                                                             |
| 2   | (psoria\$ or palmoplantar\$ pustulosis or pustulosis palmaris et plantaris).ti,ab.                                                                         |
| 3   | or/1-2                                                                                                                                                     |
| 4   | exp Methotrexate/                                                                                                                                          |
| 5   | (methotrexate\$ or amethopterin or mtx or mexate).ti,ab.                                                                                                   |
| 6   | exp Cyclosporine/                                                                                                                                          |
| 7   | (Ciclosporin or cyclosporine or cyclosporin).ti,ab.                                                                                                        |
| 8   | exp Acitretin/                                                                                                                                             |
| 9   | (acitretin or soriatane or neotigason).ti,ab.                                                                                                              |
| 10  | exp Certolizumab pegol/                                                                                                                                    |
| 11  | (certolizumab pegol or cimzia or CDP870 or CDP 870).ti,ab.                                                                                                 |
| 12  | exp Adalimumab/                                                                                                                                            |
| 13  | (adalimumab\$ or humira or d2e7).ti,ab.                                                                                                                    |
| 14  | exp Etanercept/                                                                                                                                            |
| 15  | (etanercept\$ or enbrel or embrel or benepali).ti,ab.                                                                                                      |
| 16  | (brodalumab or siliq or kyntheum or KHK4827 or KHK 4827 or AMG 827 or AMG827).ti,ab.                                                                       |
| 17  | (ixekizumab or taltz or ly2439821 or ly 2439821).ti,ab.                                                                                                    |
| 18  | (secukinumab or cosentyx or ain457 or ain 457).ti,ab.                                                                                                      |
| 19  | (guselkumab or tremfya or cnto 1959 or cnto1959).ti,ab.                                                                                                    |
| 20  | exp ustekinumab/                                                                                                                                           |
| 21  | (ustekinumab or stelara or cnto 1275 or cnto1275).ti,ab.                                                                                                   |
| 22  | (tildrakizumab or Ilumya or Ilumetri or mk 3222 or mk3222 or sch 900222 or sch900222).ti,ab.                                                               |
| 23  | (risankizumab or bi 655066 or bi655066 or "abbv 066" or abbv066).ti,ab.                                                                                    |
| 24  | (bimekizumab or UCB4940 or UCB 4940).ti,ab.                                                                                                                |
| 25  | exp infliximab/                                                                                                                                            |
| 26  | (infliximab or remicade or renflexis or inflectra or ca2).ti,ab.                                                                                           |
| 27  | (apremilast or otezla or cc-10004 or cc 10004 or cc10004).ti,ab.                                                                                           |
| 28  | exp dimethyl fumarate/                                                                                                                                     |
| 29  | (dimethyl fumarate or dimethylfumarate or bg 0012 or bg00012 or bg-00012 or tecfidera or fag201 or fag 201 or fag-201 or fumaderm or bg12 or bg-12).ti,ab. |
| 30  | exp Interleukin-23 Subunit p19/                                                                                                                            |
| 31  | (interleukin 23p19 or interleukin23p19 or interleukin-23p19 or IL-23p19 or IL-23 p19).ti,ab.                                                               |
| 32  | or/4-31                                                                                                                                                    |
| 33  | exp random allocation/                                                                                                                                     |
| 34* | exp Randomized Controlled Trial/                                                                                                                           |
| 35* | random*.ti,ab.                                                                                                                                             |
| 36  | 'rct'.ti,ab.                                                                                                                                               |
| 37* | 'controlled trial'.ti,ab.                                                                                                                                  |
| 38* | 'clinical trial'.ti,ab.                                                                                                                                    |
| 39* | 'trial'.ti,ab.                                                                                                                                             |
| 40  | exp Single-Blind Method/                                                                                                                                   |
| 41  | exp Double-Blind Method/                                                                                                                                   |
| 42  | 'cross over'.ti,ab.                                                                                                                                        |
| 43  | 'crossover'.ti,ab.                                                                                                                                         |

| #   | Search Strings                     |
|-----|------------------------------------|
| 44* | exp PLACEBOS/                      |
| 45  | exp placebo effect/                |
| 46* | 'placebo'.ti,ab.                   |
| 47  | (doubl* and blind*).ti,ab.         |
| 48  | (singl* and blind*).ti,ab.         |
| 49  | ('open' and label*).ti,ab.         |
| 50  | factorial*.ti,ab.                  |
| 51  | assign*.ti,ab.                     |
| 52  | allocate*.ti,ab.                   |
| 53  | volunteer*.ti,ab.                  |
| 54  | 'controlled study'.ti,ab.          |
| 55  | 'major clinical study'.ti,ab.      |
| 56  | 'clinical article'.ti,ab.          |
| 57  | or/33-56                           |
| 58  | 3 and 32 and 57                    |
| 59* | animals/ not humans/               |
| 60  | exp animals, laboratory/           |
| 61  | exp animal experimentation/        |
| 62  | exp models, animal/                |
| 63  | exp rodentia/                      |
| 64  | (rat or rats or mouse or mice).ti. |
| 65  | or/59-64                           |
| 66  | 58 not 65                          |
| 67  | limit 66 to english language       |
| 68  | limit 67 to abstracts              |
| 69  | congress.pt.                       |
| 70  | clinical conference.pt.            |
| 71  | or/69-70                           |
| 72  | limit 71 to yr="1966 - 2019"       |
| 73  | 68 not 72                          |

\*Search strategy adapted based on Cochrane Handbook for maximising search sensitivity and precision for interventions [40].

Supplementary Table 3. SLR Search Strategy CDSR via Ovid

| #  | Search Strings                                                                                                                                               |
|----|--------------------------------------------------------------------------------------------------------------------------------------------------------------|
| 1  | [exp Psoriasis/]                                                                                                                                             |
| 2  | (psoria\$ or palmoplantar\$ pustulosis or pustulosis palmaris et plantaris).ti,ab.                                                                           |
| 3  | or/1-2                                                                                                                                                       |
| 4  | [exp Methotrexate/]                                                                                                                                          |
| 5  | (methotrexate\$ or amethopterin or mtx or mexate).ti,ab.                                                                                                     |
| 6  | [exp Cyclosporine/]                                                                                                                                          |
| 7  | (Ciclosporin or cyclosporine or cyclosporin).ti,ab.                                                                                                          |
| 8  | [exp Acitretin/]                                                                                                                                             |
| 9  | (acitretin or soriatane or neotigason).ti,ab.                                                                                                                |
| 10 | [exp Certolizumab pegol/]                                                                                                                                    |
| 11 | (certolizumab pegol or cimzia or CDP870 or CDP 870).ti,ab.                                                                                                   |
| 12 | [exp Adalimumab/]                                                                                                                                            |
| 13 | (adalimumab\$ or humira or d2e7).ti,ab.                                                                                                                      |
| 14 | [exp Etanercept/]                                                                                                                                            |
| 15 | (etanercept\$ or enbrel or embrel or benepali).ti,ab.                                                                                                        |
| 16 | (brodalumab or siliq or kyntheum or KHK4827 or KHK 4827 or AMG 827 or AMG827).ti,ab.                                                                         |
| 17 | (ixekizumab or taltz or ly2439821 or ly 2439821).ti,ab.                                                                                                      |
| 18 | (secukinumab or cosentyx or ain457 or ain 457).ti,ab.                                                                                                        |
| 19 | (guselkumab or tremfya or cnto 1959 or cnto1959).ti,ab.                                                                                                      |
| 20 | [exp ustekinumab/]                                                                                                                                           |
| 21 | (ustekinumab or stelara or cnto 1275 or cnto1275).ti,ab.                                                                                                     |
| 22 | (tildrakizumab or Ilumya or Ilumetri or mk 3222 or mk3222 or sch 900222 or sch900222).ti,ab.                                                                 |
| 23 | (risankizumab or bi 655066 or bi655066 or "abbv 066" or abbv066).ti,ab.                                                                                      |
| 24 | (bimekizumab or UCB4940 or UCB 4940).ti,ab.                                                                                                                  |
| 25 | [exp infliximab/]                                                                                                                                            |
| 26 | (infliximab or remicade or renflexis or inflectra or ca2).ti,ab.                                                                                             |
| 27 | (apremilast or otezla or cc-10004 or cc 10004 or cc10004).ti,ab.                                                                                             |
| 28 | [exp dimethyl fumarate/]                                                                                                                                     |
| 29 | (dimethyl fumarate or dimethylfumarate or "bg 0012" or bg00012 or bg-00012 or tecfidera or fag201 or fag 201 or fag-201 or fumaderm or bg12 or bg-12).ti,ab. |
| 30 | [exp Interleukin-23 Subunit p19/]                                                                                                                            |
| 31 | (interleukin 23p19 or interleukin23p19 or interleukin-23p19 or IL-23p19 or IL-23 p19).ti,ab.                                                                 |
| 32 | or/4-31                                                                                                                                                      |
| 33 | [exp random allocation/]                                                                                                                                     |
| 34 | [exp Randomized Controlled Trial/]                                                                                                                           |
| 35 | random*.ti,ab.                                                                                                                                               |
| 36 | 'rct'.ti,ab.                                                                                                                                                 |
| 37 | 'controlled trial'.ti,ab.                                                                                                                                    |
| 38 | 'clinical trial'.ti,ab.                                                                                                                                      |
| 39 | 'trial'.ti,ab.                                                                                                                                               |
| 40 | [exp Single-Blind Method/]                                                                                                                                   |
| 41 | [exp Double-Blind Method/]                                                                                                                                   |
| 42 | 'cross over'.ti,ab.                                                                                                                                          |

| #  | Search Strings                                                        |
|----|-----------------------------------------------------------------------|
| 43 | 'crossover'.ti,ab.                                                    |
| 44 | [exp PLACEBOS/]                                                       |
| 45 | [exp placebo effect/]                                                 |
| 46 | 'placebo'.ti,ab.                                                      |
| 47 | (doubl* and blind*).ti,ab.                                            |
| 48 | (singl* and blind*).ti,ab.                                            |
| 49 | ('open' and label*).ti,ab.                                            |
| 50 | factorial*.ti,ab.                                                     |
| 51 | assign*.ti,ab.                                                        |
| 52 | allocate*.ti,ab.                                                      |
| 53 | volunteer*.ti,ab.                                                     |
| 54 | 'controlled study'.ti,ab.                                             |
| 55 | 'major clinical study'.ti,ab.                                         |
| 56 | 'clinical article'.ti,ab.                                             |
| 57 | or/33-56                                                              |
| 58 | 3 and 32 and 57                                                       |
| 59 | [animals/ not humans/]                                                |
| 60 | [exp animals, laboratory/]                                            |
| 61 | [exp animal experimentation/]                                         |
| 62 | [exp models, animal/]                                                 |
| 63 | [exp rodentia/]                                                       |
| 64 | (rat or rats or mouse or mice).ti.                                    |
| 65 | or/59-64                                                              |
| 66 | 58 not 65                                                             |
| 67 | limit 66 to english language [Limit not valid; records were retained] |
| 68 | limit 67 to abstracts [Limit not valid; records were retained]        |
| 69 | congress.pt.                                                          |
| 70 | clinical conference.pt.                                               |
| 71 | or/69-70                                                              |
| 72 | limit 71 to yr="1966 - 2019"                                          |
| 73 | 68 not 72                                                             |

\*Search strategy adapted based on Cochrane Handbook for maximising search sensitivity and precision for interventions [40].

Supplementary Table 4. Search Strategy CENTRAL via Ovid

| #  | Search Strings                                                                                                                                               |
|----|--------------------------------------------------------------------------------------------------------------------------------------------------------------|
| 1  | [exp Psoriasis/]                                                                                                                                             |
| 2  | (psoria\$ or palmoplantar\$ pustulosis or pustulosis palmaris et plantaris).ti,ab.                                                                           |
| 3  | or/1-2                                                                                                                                                       |
| 4  | [exp Methotrexate/]                                                                                                                                          |
| 5  | (methotrexate\$ or amethopterin or mtx or mexate).ti,ab.                                                                                                     |
| 6  | [exp Cyclosporine/]                                                                                                                                          |
| 7  | (Ciclosporin or cyclosporine or cyclosporin).ti,ab.                                                                                                          |
| 8  | [exp Acitretin/]                                                                                                                                             |
| 9  | (acitretin or soriatane or neotigason).ti,ab.                                                                                                                |
| 10 | [exp Certolizumab pegol/]                                                                                                                                    |
| 11 | (certolizumab pegol or cimzia or CDP870 or CDP 870).ti,ab.                                                                                                   |
| 12 | [exp Adalimumab/]                                                                                                                                            |
| 13 | (adalimumab\$ or humira or d2e7).ti,ab.                                                                                                                      |
| 14 | [exp Etanercept/]                                                                                                                                            |
| 15 | (etanercept\$ or enbrel or embrel or benepali).ti,ab.                                                                                                        |
| 16 | (brodalumab or siliq or kyntheum or KHK4827 or KHK 4827 or AMG 827 or AMG827).ti,ab.                                                                         |
| 17 | (ixekizumab or taltz or ly2439821 or ly 2439821).ti,ab.                                                                                                      |
| 18 | (secukinumab or cosentyx or ain457 or ain 457).ti,ab.                                                                                                        |
| 19 | (guselkumab or tremfya or cnto 1959 or cnto1959).ti,ab.                                                                                                      |
| 20 | [exp ustekinumab/]                                                                                                                                           |
| 21 | (ustekinumab or stelara or cnto 1275 or cnto1275).ti,ab.                                                                                                     |
| 22 | (tildrakizumab or Ilumya or Ilumetri or mk 3222 or mk3222 or sch 900222 or sch900222).ti,ab.                                                                 |
| 23 | (risankizumab or bi 655066 or bi655066 or "abbv 066" or abbv066).ti,ab.                                                                                      |
| 24 | (bimekizumab or UCB4940 or UCB 4940).ti,ab.                                                                                                                  |
| 25 | [exp infliximab/]                                                                                                                                            |
| 26 | (infliximab or remicade or renflexis or inflectra or ca2).ti,ab.                                                                                             |
| 27 | (apremilast or otezla or cc-10004 or cc 10004 or cc10004).ti,ab.                                                                                             |
| 28 | [exp dimethyl fumarate/]                                                                                                                                     |
| 29 | (dimethyl fumarate or dimethylfumarate or "bg 0012" or bg00012 or bg-00012 or tecfidera or fag201 or fag 201 or fag-201 or fumaderm or bg12 or bg-12).ti,ab. |
| 30 | [exp Interleukin-23 Subunit p19/]                                                                                                                            |
| 31 | (interleukin 23p19 or interleukin23p19 or interleukin-23p19 or IL-23p19 or IL-23 p19).ti,ab.                                                                 |
| 32 | or/4-31                                                                                                                                                      |
| 33 | [exp random allocation/]                                                                                                                                     |
| 34 | [exp Randomized Controlled Trial/]                                                                                                                           |
| 35 | random*.ti,ab.                                                                                                                                               |
| 36 | 'rct'.ti,ab.                                                                                                                                                 |
| 37 | 'controlled trial'.ti,ab.                                                                                                                                    |
| 38 | 'clinical trial'.ti,ab.                                                                                                                                      |
| 39 | 'trial'.ti,ab.                                                                                                                                               |
| 40 | [exp Single-Blind Method/]                                                                                                                                   |
| 41 | [exp Double-Blind Method/]                                                                                                                                   |
| 42 | 'cross over'.ti,ab.                                                                                                                                          |



| #  | Search Strings                                                        |
|----|-----------------------------------------------------------------------|
| 43 | 'crossover'.ti,ab.                                                    |
| 44 | [exp PLACEBOS/]                                                       |
| 45 | [exp placebo effect/]                                                 |
| 46 | 'placebo'.ti,ab.                                                      |
| 47 | (doubl* and blind*).ti,ab.                                            |
| 48 | (singl* and blind*).ti,ab.                                            |
| 49 | ('open' and label*).ti,ab.                                            |
| 50 | factorial*.ti,ab.                                                     |
| 51 | assign*.ti,ab.                                                        |
| 52 | allocate*.ti,ab.                                                      |
| 53 | volunteer*.ti,ab.                                                     |
| 54 | 'controlled study'.ti,ab.                                             |
| 55 | 'major clinical study'.ti,ab.                                         |
| 56 | 'clinical article'.ti,ab.                                             |
| 57 | or/33-56                                                              |
| 58 | 3 and 32 and 57                                                       |
| 59 | [animals/ not humans/]                                                |
| 60 | [exp animals, laboratory/]                                            |
| 61 | [exp animal experimentation/]                                         |
| 62 | [exp models, animal/]                                                 |
| 63 | [exp rodentia/]                                                       |
| 64 | (rat or rats or mouse or mice).ti.                                    |
| 65 | or/59-64                                                              |
| 66 | 58 not 65                                                             |
| 67 | limit 66 to english language [Limit not valid; records were retained] |
| 68 | limit 67 to abstracts [Limit not valid; records were retained]        |
| 69 | congress.pt.                                                          |
| 70 | clinical conference.pt.                                               |
| 71 | or/69-70                                                              |
| 72 | limit 71 to yr="1966 - 2019"                                          |
| 73 | 68 not 72                                                             |

\*Search strategy adapted based on Cochrane Handbook for maximising search sensitivity and precision for interventions [40].

**Supplementary Table 5. Selection Criteria for SLR**

| Category      | Inclusion Criteria*                                                                                                                                                                                                                                                                                                                                                                                                                                                                                                                                                                                                                                                                                                                                                                                                                                                                                                                                                                                                                                                                                                                                                                                                                                                                                                                                                                                                                                                                                                                                     | Exclusion Criteria                                                                                                                                                                                                                           |
|---------------|---------------------------------------------------------------------------------------------------------------------------------------------------------------------------------------------------------------------------------------------------------------------------------------------------------------------------------------------------------------------------------------------------------------------------------------------------------------------------------------------------------------------------------------------------------------------------------------------------------------------------------------------------------------------------------------------------------------------------------------------------------------------------------------------------------------------------------------------------------------------------------------------------------------------------------------------------------------------------------------------------------------------------------------------------------------------------------------------------------------------------------------------------------------------------------------------------------------------------------------------------------------------------------------------------------------------------------------------------------------------------------------------------------------------------------------------------------------------------------------------------------------------------------------------------------|----------------------------------------------------------------------------------------------------------------------------------------------------------------------------------------------------------------------------------------------|
| Population    | Adult (≥18 years) patients with moderate to severe or very severe chronic psoriasis who were candidates for systemic psoriasis therapy                                                                                                                                                                                                                                                                                                                                                                                                                                                                                                                                                                                                                                                                                                                                                                                                                                                                                                                                                                                                                                                                                                                                                                                                                                                                                                                                                                                                                  | <ul style="list-style-type: none"> <li>• Studies on patients with other than moderate to severe forms of chronic psoriasis</li> <li>• Studies primarily focused on the treatment of PsA</li> <li>• Studies on paediatric patients</li> </ul> |
| Interventions | <p>Systemic biologics:</p> <ul style="list-style-type: none"> <li>• Adalimumab 80 mg at Week 0 and 40 mg Q2W</li> <li>• Brodalumab 210 mg Weeks 0 and 1, and 2 then Q2W</li> <li>• Bimekizumab** (64 mg Q4W, 160 mg Q4W with 320 mg loading dose, 320 mg Q4W, 320 mg Q8W, and 480 mg Q4W)</li> <li>• Certolizumab pegol, a loading dose of 400 mg at Weeks 0, 2 and 4, followed by 200 mg Q2W</li> <li>• Certolizumab pegol, a loading dose of 400 mg at Weeks 0, 2 and 4, followed by 400 mg Q2W</li> <li>• Etanercept 50 mg twice weekly for three months then once weekly for maintenance</li> <li>• Etanercept 25 mg twice weekly</li> <li>• Guselkumab 100 mg at Weeks 0 and 4 then Q8W</li> <li>• Infliximab 5 mg/kg Weeks 0, 2, and 6 then Q8W</li> <li>• IL-31 100 mg</li> <li>• Ixekizumab 160 mg Week 0 followed by 80 mg Q2W from Weeks 2–12 then Q4W</li> <li>• Risankizumab 150 mg at Week 0 and 4 then Q12W</li> <li>• Secukinumab 150 mg or 300 mg Weeks 0, 1, 2, and 3, followed by maintenance dosing at Week 4 Q4W</li> <li>• Tildrakizumab 100 mg at Weeks 0 and 4 and then Q12W thereafter (In patients with certain characteristics [for example, high disease burden, body weight of 90 kg or more] a 200 mg dose may provide greater efficacy)</li> <li>• Ustekinumab 45 mg or 90 mg both at Weeks 0, 4, then Q12W</li> </ul> <p>Systemic non-biologics:***</p> <ul style="list-style-type: none"> <li>• Apremilast</li> <li>• Methotrexate</li> <li>• Cyclosporine</li> <li>• Dimethyl fumarate</li> <li>• Acitretin</li> </ul> | <p>Studies that did not include a treatment arm with any of the selected comparators of interest</p>                                                                                                                                         |
| Comparisons   | Placebo; any of the above therapies                                                                                                                                                                                                                                                                                                                                                                                                                                                                                                                                                                                                                                                                                                                                                                                                                                                                                                                                                                                                                                                                                                                                                                                                                                                                                                                                                                                                                                                                                                                     | Comparisons of different dosages of the same intervention                                                                                                                                                                                    |
| Outcomes****  | <ul style="list-style-type: none"> <li>• PASI 50, 75, 90, 100</li> <li>• Adverse effects of treatment (including discontinuation due to adverse effects)</li> </ul>                                                                                                                                                                                                                                                                                                                                                                                                                                                                                                                                                                                                                                                                                                                                                                                                                                                                                                                                                                                                                                                                                                                                                                                                                                                                                                                                                                                     | Publications that did not report data on relevant outcomes                                                                                                                                                                                   |
| Study designs | RCTs, phase II, III, IV, including follow-up studies of RCTs                                                                                                                                                                                                                                                                                                                                                                                                                                                                                                                                                                                                                                                                                                                                                                                                                                                                                                                                                                                                                                                                                                                                                                                                                                                                                                                                                                                                                                                                                            | Observational/real-world evidence studies; single-arm trials                                                                                                                                                                                 |
| Subgroups     | <ul style="list-style-type: none"> <li>• Previous use of phototherapy and systemic non-biological therapy</li> <li>• Previous use of biological therapy</li> <li>• Severity of psoriasis</li> </ul>                                                                                                                                                                                                                                                                                                                                                                                                                                                                                                                                                                                                                                                                                                                                                                                                                                                                                                                                                                                                                                                                                                                                                                                                                                                                                                                                                     | NA                                                                                                                                                                                                                                           |

| Category          | Inclusion Criteria*                                                                                | Exclusion Criteria                                                                                                                                                                                                                                 |
|-------------------|----------------------------------------------------------------------------------------------------|----------------------------------------------------------------------------------------------------------------------------------------------------------------------------------------------------------------------------------------------------|
| Publication types | NA                                                                                                 | Publications of the following types: <ul style="list-style-type: none"> <li>• Narrative publications</li> <li>• Non-systematic reviews</li> <li>• Phase I studies</li> <li>• Case studies</li> <li>• Case reports</li> <li>• Editorials</li> </ul> |
| Limits            | Only English-language articles/conference abstracts were included                                  | Journal articles and conference abstracts not available in English                                                                                                                                                                                 |
|                   | No limitation for peer reviewed publications; conference abstracts were restricted to 2016–current | Studies published outside the time frame of interest                                                                                                                                                                                               |

\*Studies/treatment arms only evaluating ustekinumab 45 mg have been excluded from the SLR and NMA, as the ustekinumab 45 mg body weight requirement results in limited available data, comparability to the population for other treatments, and generalisability of the findings.

\*\*Only the approved dose of bimekizumab (i.e., 320 mg) was included in the quantitative synthesis.

\*\*\*Any dose of systemic non-biologic treatments have been included, as doses are often modified or titrated.

\*\*\*\*All variations in outcome endpoints were extracted as reported.

Abbreviations: IL = interleukin; NA = not applicable; PASI = Psoriasis Area and Severity Index; PsA = psoriatic arthritis; Q2W = every 2 weeks; Q4W = every 4 weeks; Q8W = every 8 weeks; Q12W = every 12 weeks; RCT = randomised controlled trials  
SLR = systematic literature review.

Supplementary Table 6. Study and Patient Characteristics of Studies Included in the Efficacy and/or Safety NMA

| Study (Phase)               | Severity Definition                              | Intervention(s) and Comparators                                | Age in Years: Mean (SD) | Male (%) | PsA (%) | Disease Duration (Years) | % with Prior Therapy: Biologic/Non-Biologic | PASI Base Case | PASI SA | SAE NMA |
|-----------------------------|--------------------------------------------------|----------------------------------------------------------------|-------------------------|----------|---------|--------------------------|---------------------------------------------|----------------|---------|---------|
| ALLURE [41] (Phase 3)       | PASI $\geq$ 12<br>BSA $\geq$ 10%<br>IGA $\geq$ 3 | Secukinumab 300 mg Q4W (single 300 mg/2 mL pre-filled syringe) | 43 (14)                 | 61       | 19      | 19                       | NR/NR                                       | ✓              |         |         |
|                             |                                                  | Secukinumab 300 mg Q4W (two 150 mg/1 mL pre-filled syringes)   | 46 (14)                 | 61       | 23      | 15                       | NR/NR                                       |                |         |         |
|                             |                                                  | Placebo                                                        | 41 (13)                 | 65       | 17      | 18                       | NR/NR                                       |                |         |         |
| AMAGINE 2 [42] (Phase 3)    | PASI $\geq$ 12<br>BSA $\geq$ 10%<br>PGA $\geq$ 3 | Ustekinumab 45 or 90 mg Q12W                                   | 45 (13)                 | 68       | 17      | 19                       | 28/NR                                       | ✓              | ✓       |         |
|                             |                                                  | Brodalumab 210 mg Q2W                                          | 45 (13)                 | 69       | 19      | 19                       | 29/NR                                       |                |         |         |
|                             |                                                  | Placebo                                                        | 44 (13)                 | 71       | 17      | 18                       | 29/NR                                       |                |         |         |
| AMAGINE 3 [42] (Phase 3)    | PASI $\geq$ 12<br>BSA $\geq$ 10%<br>PGA $\geq$ 3 | Placebo                                                        | 44 (13)                 | 66       | 19      | 18                       | 24/NR                                       | ✓              | ✓       |         |
|                             |                                                  | Ustekinumab 45 or 90 mg Q12W                                   | 45 (13)                 | 68       | 20      | 18                       | 24/NR                                       |                |         |         |
|                             |                                                  | Brodalumab 210 mg Q2W                                          | 45 (13)                 | 69       | 20      | 18                       | 25/NR                                       |                |         |         |
| BE RADIANT [18] (Phase 3b)  | PASI $\geq$ 12<br>BSA $\geq$ 10%<br>IGA $\geq$ 3 | Bimekizumab 320 mg Q4W                                         | NR                      | NR       | NR      | NR                       | NR/ NR                                      | ✓              | ✓       | ✓       |
|                             |                                                  | Secukinumab 300 mg Q4W                                         | NR                      | NR       | NR      | NR                       | NR/ NR                                      |                |         |         |
| BE SURE [19] (Phase 3)      | PASI $\geq$ 12<br>BSA $\geq$ 10%<br>IGA $\geq$ 3 | Bimekizumab 320 mg Q4W                                         | 44.6 (13.3)             | 67.1     | NR      | 18.8                     | 31.3/71.5                                   | ✓              | ✓       |         |
|                             |                                                  | Adalimumab 40 mg Q2W                                           | 45.5 (14.3)             | 71.7     | NR      | 16.2                     | 33.3/69.2                                   |                |         |         |
| BE VIVID [9] (Phase 3)      | PASI $\geq$ 12<br>BSA $\geq$ 10%<br>IGA $\geq$ 3 | Bimekizumab 320 mg Q4W                                         | 45.2 (14)               | 71.3     | NR      | 16                       | 38.9/83.2                                   | ✓              | ✓       | ✓       |
|                             |                                                  | Ustekinumab 45 or 90 mg Q12W                                   | 46 (13.6)               | 71.8     | NR      | 17.8                     | 38.7/81                                     |                |         |         |
|                             |                                                  | Placebo                                                        | 49.7 (13.6)             | 72.3     | NR      | 19.7                     | 39.8/77.1                                   |                |         |         |
| CAIN457A2318 [43] (Phase 3) | PASI $\geq$ 12<br>BSA $\geq$ 10%<br>IGA $\geq$ 3 | Secukinumab 150 mg Q4W                                         | 41 (11.39)              | 72.8     | NR      | NR                       | NR                                          | ✓              | ✓       | ✓       |
|                             |                                                  | Secukinumab 300 mg Q4W                                         | 39.9 (12.35)            | 75.4     | NR      | NR                       | NR                                          |                |         |         |
|                             |                                                  | Placebo                                                        | 40.1 (11.01)            | 80.0     | NR      | NR                       | NR                                          |                |         |         |
| CARIMA [33]                 | PASI $\geq$ 10                                   | Secukinumab 150 mg Q4W                                         | 46 (14.4)               | 57.4     | 27.8    | 20.8                     | 31.1/89.6                                   | ✓              |         |         |

| Study (Phase)                     | Severity Definition                          | Intervention(s) and Comparators | Age in Years: Mean (SD) | Male (%) | PsA (%) | Disease Duration (Years) | % with Prior Therapy: Biologic/Non-Biologic | PASI Base Case | PASI SA | SAE NMA |
|-----------------------------------|----------------------------------------------|---------------------------------|-------------------------|----------|---------|--------------------------|---------------------------------------------|----------------|---------|---------|
| <b>(Phase 3)</b>                  |                                              | Secukinumab 300 mg Q4W          | 44.2 (12.9)             | 77.1     | 25      | 20.6                     | 37/85.2                                     |                |         |         |
|                                   |                                              | Placebo to Secukinumab 150 mg*  | 46.8 (13.1)             | 69.6     | 17.4    | 20.3                     | 39.1/69.6                                   |                |         |         |
|                                   |                                              | Placebo to Secukinumab 300 mg*  | 43.7 (11.4)             | 69.2     | 15.4    | 18.9                     | 30.8/92.3                                   |                |         |         |
| <b>CLARITY [44] (Phase 3)</b>     | PASI ≥12<br>BSA ≥10%<br>Modified IGA 2011 ≥3 | Secukinumab 300 mg Q4W          | 45.4 (14.1)             | 64.7     | NR      | 16.8                     | 20/NR                                       | ✓              | ✓       | ✓       |
|                                   |                                              | Ustekinumab 45 or 90 mg Q12W    | 45.3 (14.2)             | 68.1     | NR      | 17.3                     | 23.6/NR                                     |                |         |         |
| <b>CLEAR [45] (Phase 3)</b>       | PASI ≥12<br>BSA ≥10%<br>Modified IGA 2011 ≥3 | Secukinumab 300 mg Q4W          | 45.2 (14)               | 68       | 20.5    | 19.7                     | 14.2/NR                                     | ✓              | ✓       | ✓       |
|                                   |                                              | Ustekinumab 45 or 90 mg Q12W    | 44.6 (13.7)             | 74.3     | 15.9    | 16.1                     | 13/NR                                       |                |         |         |
| <b>ECLIPSE [26] (Phase 3)</b>     | NR                                           | Guselkumab 100 mg Q8W           | NR                      | NR       | NR      | NR                       | NR/NR                                       | ✓              | ✓       | ✓       |
|                                   |                                              | Secukinumab 300 mg Q4W          | NR                      | NR       | NR      | NR                       | NR/NR                                       |                |         |         |
| <b>ERASURE [46] (Phase 3)</b>     | PASI ≥12<br>BSA ≥10%<br>PGA ≥3               | Secukinumab 300 mg Q4W          | 44.9 (13.5)             | 69       | 23.3    | 17.4                     | 28.6/NR                                     | ✓              | ✓       |         |
|                                   |                                              | Secukinumab 150 mg Q4W          | 44.9 (13.3)             | 68.6     | 18.8    | 17.5                     | 29.8/NR                                     |                |         |         |
|                                   |                                              | Placebo                         | 45.4 (12.6)             | 69.4     | 27.4    | 17.3                     | 29.4/NR                                     |                |         |         |
| <b>EXPRESS [47] (Phase 3)</b>     | PASI ≥12<br>BSA ≥10%                         | Infliximab 5 mg/kg Q8W          | 42.6 (11.7)             | 68.8     | NR      | 19.1                     | 0**/NR                                      | ✓              |         |         |
|                                   |                                              | Placebo                         | 43.8 (12.6)             | 79.2     | NR      | 17.3                     | 0**/NR                                      |                |         |         |
| <b>EXPRESS II [48] (Phase 3)</b>  | PASI ≥12<br>BSA ≥10%                         | Infliximab 5 mg/kg Q8W          | 44.5 (13)               | 65       | 28.3    | 19.1                     | 14.3/NR                                     | ✓              |         |         |
|                                   |                                              | Placebo                         | 44.4 (12.5)             | 69.2     | 26      | 17.8                     | 13/NR                                       |                |         |         |
| <b>FEATURE [49, 50] (Phase 3)</b> | PASI ≥12<br>BSA ≥10%<br>Modified IGA 2011 ≥3 | Secukinumab 300 mg Q4W          | 45.1 (12.6)             | 64.4     | NR      | 18                       | 39/NR                                       | ✓              | ✓       |         |
|                                   |                                              | Secukinumab 150 mg Q4W          | 46 (15.1)               | 67.8     | NR      | 20.4                     | 47.5/NR                                     |                |         |         |
|                                   |                                              | Placebo                         | 46.5 (14.1)             | 66.1     | NR      | 20.2                     | 44.1/NR                                     |                |         |         |
| <b>FIXTURE [46]</b>               | PASI ≥12                                     | Secukinumab 300 mg Q4W          | 44.5 (13.2)             | 68.5     | 15.3    | 15.8                     | 11.6/NR                                     | ✓              | ✓       |         |

| Study (Phase)                          | Severity Definition                                     | Intervention(s) and Comparators | Age in Years: Mean (SD) | Male (%) | PsA (%) | Disease Duration (Years) | % with Prior Therapy: Biologic/Non-Biologic | PASI Base Case | PASI SA | SAE NMA |
|----------------------------------------|---------------------------------------------------------|---------------------------------|-------------------------|----------|---------|--------------------------|---------------------------------------------|----------------|---------|---------|
| <b>(Phase 3)</b>                       | BSA $\geq$ 10%<br>PGA $\geq$ 3                          | Secukinumab 150 mg Q4W          | 45.4 (12.9)             | 72.2     | 15      | 17.3                     | 13.8/NR                                     |                |         |         |
|                                        |                                                         | Etanercept 50 mg BIW            | 43.8 (13)               | 71.2     | 13.5    | 16.4                     | 13.8/NR                                     |                |         |         |
|                                        |                                                         | Placebo                         | 44.1 (12.6)             | 72.7     | 15      | 16.6                     | 10.7/NR                                     |                |         |         |
| <b>Igarashi, 2012 [51] (Phase 2/3)</b> | PASI $\geq$ 12<br>BSA $\geq$ 10%                        | Ustekinumab 45 mg Q12W          | Median: 45              | 82.8     | 9.4     | 15.8                     | 1.6/0                                       | ✓              |         |         |
|                                        |                                                         | Ustekinumab 90 mg Q12W          | Median: 44              | 75.8     | 11.3    | 17.3                     | 0/0                                         |                |         |         |
|                                        |                                                         | Placebo                         | Median: 49.0            | 83.9     | 3.1     | 16                       | 0/0                                         |                |         |         |
| <b>IMMerge [52] (Phase 3)</b>          | PASI $\geq$ 12<br>BSA $\geq$ 10%<br>Static PGA $\geq$ 3 | Risankizumab 150 mg Q12W        | 47.3                    | 68.3     | NR      | 18.6                     | 37.8/NR                                     | ✓              | ✓       | ✓       |
|                                        |                                                         | Secukinumab 300 mg Q4W          | 46.8                    | 62       | NR      | 17.4                     | 35.6/NR                                     |                |         |         |
| <b>IXORA-S [53] (Phase 3)</b>          | PASI $\geq$ 10                                          | Ustekinumab 45 mg or 90 mg Q12W | 44 (13.3)               | 67.5     | NR      | 18.2                     | 15.1/NR                                     | ✓              | ✓       | ✓       |
|                                        |                                                         | Ixekizumab 80 mg Q2W            | 42.7 (12.7)             | 66.2     | NR      | 18                       | 13.2/NR                                     |                |         |         |
| <b>JUNCTURE [54] (Phase 3)</b>         | PASI $\geq$ 12<br>BSA $\geq$ 10%<br>PGA $\geq$ 3        | Secukinumab 300 mg              | 46.6 (14.2)             | 76.7     | 23.3    | 21                       | 25/NR                                       | ✓              | ✓       |         |
|                                        |                                                         | Secukinumab 150 mg              | 43.9 (14.4)             | 67.2     | 26.2    | 20.6                     | 24.6/NR                                     |                |         |         |
|                                        |                                                         | Placebo                         | 43.7 (12.7)             | 62.3     | 19.7    | 19.9                     | 21.3/NR                                     |                |         |         |
| <b>LIBERATE [55] (Phase 3)</b>         | PASI $\geq$ 12<br>BSA $\geq$ 10%<br>PGA $\geq$ 3        | Etanercept 50 mg QW             | 47 (14.1)               | 59       | NR      | 18.1                     | 0**/NR                                      | ✓              |         |         |
|                                        |                                                         | Placebo                         | 43.4 (14.9)             | 70.2     | NR      | 16.6                     | 0**/NR                                      |                |         |         |
|                                        |                                                         | Apremilast 30 mg BID            | 46 (13.6)               | 59       | NR      | 19.7                     | 0**/NR                                      |                |         |         |
| <b>M02-528 [56] (Phase 2)</b>          | BSA $\geq$ 5%<br>Psoriasis $\geq$ 1 year                | Adalimumab 40mg Q2W             | 46                      | 71       | 33      | 21                       | 0**/NR                                      | ✓              |         |         |
|                                        |                                                         | Placebo                         | 43                      | 65       | 31      | 19                       | 0**/NR                                      |                |         |         |
| <b>MATURE [57] (Phase 3)</b>           | PASI $\geq$ 12<br>BSA $\geq$ 10%<br>IGA $\geq$ 3        | Secukinumab 300 mg Q4W          | 44.7 (12.79)            | 70.7     | 19.5    | 19.6                     | 12.2/NR                                     | ✓              |         |         |
|                                        |                                                         | Placebo                         | 43.6 (14.08)            | 70.0     | 12.5    | 17.6                     | 17.5/NR                                     |                |         |         |
| <b>Nakagawa, 2016 [58] (Phase 3)</b>   | PASI $\geq$ 12<br>BSA $\geq$ 10%                        | Brodalumab 210 mg Q2W           | 46.4 (11.8)             | 78.4     | 13.5    | 14.97                    | 13.5/NR                                     | ✓              |         |         |
|                                        |                                                         | Placebo                         | 46.6 (10.8)             | 71.1     | 18.4    | 16.86                    | 7.9/NR                                      |                |         |         |

| Study (Phase)                | Severity Definition                                      | Intervention(s) and Comparators | Age in Years: Mean (SD) | Male (%) | PsA (%) | Disease Duration (Years) | % with Prior Therapy: Biologic/Non-Biologic | PASI Base Case | PASI SA | SAE NMA |
|------------------------------|----------------------------------------------------------|---------------------------------|-------------------------|----------|---------|--------------------------|---------------------------------------------|----------------|---------|---------|
| OASIS-2 [59] (Phase 3)       | NR                                                       | Secukinumab 300 mg Q4W          | NR                      | NR       | NR      | NR                       | NR                                          | ✓              |         |         |
|                              |                                                          | Placebo                         | NR                      | NR       | NR      | NR                       | NR                                          |                |         |         |
| Obe-Pso-S [34] (Phase 4)     | PASI ≥12<br>BSA ≥10%<br>IGA ≥3                           | Secukinumab 300 mg Q4W          | 41.5 (15.2)             | 59.3     | NR      | NR                       | NR                                          | ✓              |         |         |
|                              |                                                          | Placebo                         | 50.4 (13.1)             | 71.4     | NR      | NR                       | NR                                          |                |         |         |
| Ohtsuki, 2017 [60] (Phase 2) | PASI ≥12<br>BSA ≥10%                                     | Apremilast 30 mg BID            | 51.7 (12.7)             | 83.5     | NR      | 13.9                     | 2.4/NR                                      | ✓              |         |         |
|                              |                                                          | Placebo                         | 48.3 (12)               | 73.8     | NR      | 12.4                     | 4.8/NR                                      |                |         |         |
| Ohtsuki, 2018 [61] (Phase 3) | PASI ≥12<br>BSA ≥10%<br>IGA ≥3                           | Guselkumab 100 mg Q8W           | 47.8 (11.1)             | 74.6     | 15.9    | 14.4                     | 17.5/NR                                     | ✓              |         |         |
|                              |                                                          | Placebo                         | 48.3 (10.6)             | 84.4     | 15.6    | 13.7                     | 15.6/NR                                     |                |         |         |
| Papp-2021 [62] (Phase 2)     | PASI ≥12<br>BSA ≥10%<br>IGA ≥3                           | Secukinumab 300 mg Q4W          | 47.5 (13.8)             | 71.7     | 3.8     | 20.2                     | 13.2/NR                                     | ✓              |         |         |
|                              |                                                          | Placebo                         | 45.9 (12.9)             | 75       | 5.8     | 16.3                     | 15.4/NR                                     |                |         |         |
| Seo 2021 [63] (Phase 3)      | PASI ≥12<br>BSA ≥10%<br>Static PGA ≥3                    | Brodalumab 210 mg Q2W           | 43.5 (14.3)             | 57.5     | NR      | 10.9 years               | 10/NR                                       | ✓              |         |         |
|                              |                                                          | Placebo                         | 43.7 (15.8)             | 68.2     | NR      | 13.6 years               | 36.4/NR                                     |                |         |         |
| SustaIMM [64] (Phase 2/3)    | PASI ≥12<br>BSA ≥10%<br>Static PGA ≥3                    | Risankizumab 150 mg Q12W        | 53.3 (11.9)             | 91       | 9       | NR                       | 29/NR                                       | ✓              |         |         |
|                              |                                                          | Placebo                         | 50.9 (11.2)             | 78       | 12      | NR                       | 24/NR                                       |                |         |         |
| TRANSFIGURE [65] (Phase 3)   | PASI ≥12<br>BSA ≥10%<br>NAPSI ≥16 at least 4 fingernails | Secukinumab 300 mg Q4W          | 45.1 (12.9)             | 80       | 26      | 18                       | 24/NR                                       | ✓              | ✓       |         |
|                              |                                                          | Secukinumab 150 mg Q4W          | 43.5 (10.9)             | 82       | 24      | 20                       | 22/NR                                       |                |         |         |
|                              |                                                          | Placebo                         | 43.6 (11.2)             | 80       | 28      | 17.4                     | 23/NR                                       |                |         |         |
| Tyring, 2006 [66]            | PASI ≥12                                                 | Etanercept 50 mg BIW            | 45.8 (12.8)             | 65       | 35      | 20.1                     | 0**/NR                                      | ✓              |         |         |

| Study (Phase)                   | Severity Definition                                     | Intervention(s) and Comparators | Age in Years: Mean (SD) | Male (%) | PsA (%) | Disease Duration (Years) | % with Prior Therapy: Biologic/Non-Biologic | PASI Base Case | PASI SA | SAE NMA |
|---------------------------------|---------------------------------------------------------|---------------------------------|-------------------------|----------|---------|--------------------------|---------------------------------------------|----------------|---------|---------|
| <b>(Phase 3)</b>                | BSA $\geq$ 10%                                          | Placebo                         | 45.6 (12.1)             | 70       | 33      | 19.7                     | 0**/NR                                      |                |         |         |
| <b>UltIMMa-1 [67] (Phase 3)</b> | PASI $\geq$ 12<br>BSA $\geq$ 10%<br>Static PGA $\geq$ 3 | Risankizumab 150 mg Q12W        | 48.3 (13.4)             | 70       | 28      | NR                       | 34/NR                                       | ✓              | ✓       |         |
|                                 |                                                         | Ustekinumab 45 or 90 mg Q12W    | 46.5 (13.4)             | 70       | 23      | NR                       | 30/NR                                       |                |         |         |
|                                 |                                                         | Placebo                         | 49.3 (13.6)             | 77       | 35      | NR                       | 39/NR                                       |                |         |         |
| <b>UltIMMa-2 [67] (Phase 3)</b> | PASI $\geq$ 12<br>BSA $\geq$ 10%<br>Static PGA $\geq$ 3 | Risankizumab 150 mg Q12W        | 46.2 (13.7)             | 69       | 25      | NR                       | 40/NR                                       | ✓              | ✓       |         |
|                                 |                                                         | Ustekinumab 45 or 90 mg Q12W    | 48.6 (14.8)             | 67       | 27      | NR                       | 43/NR                                       |                |         |         |
|                                 |                                                         | Placebo                         | 46.3 (13.3)             | 68       | 33      | NR                       | 43/NR                                       |                |         |         |
| <b>UNCOVER 3 [68] (Phase 3)</b> | PASI $\geq$ 12<br>BSA $\geq$ 10%<br>Static PGA $\geq$ 3 | Ixekizumab 80 mg Q4W            | 46 (13)                 | 67       | NR      | 18                       | 15/NR                                       | ✓              |         |         |
|                                 |                                                         | Etanercept 50 mg BIW            | 46 (14)                 | 70       | NR      | 18                       | 15.7/NR                                     |                |         |         |
|                                 |                                                         | Placebo                         | 46 (12)                 | 71       | NR      | 18                       | 17.1/NR                                     |                |         |         |
| <b>UNVEIL [69] (Phase 4)</b>    | BSA 5%-10%<br>Static PGA=3                              | Apremilast 30 mg BID            | 48.6 (15.4)             | 50       | NR      | 17.5                     | 0**/NR                                      | ✓              |         |         |
|                                 |                                                         | Placebo                         | 51.1 (13.7)             | 56.2     | NR      | 13.9                     | 0**/NR                                      |                |         |         |
| <b>VOYAGE 1 [27] (Phase 3)</b>  | PASI $\geq$ 12<br>BSA $\geq$ 10%<br>IGA $\geq$ 3        | Guselkumab 100 mg Q8W           | 43.9 (12.7)             | 72.9     | 19.5    | 17.9                     | 21.6/NR                                     | ✓              | ✓       | ✓       |
|                                 |                                                         | Adalimumab 40 mg Q2W            | 42.9 (12.6)             | 74.6     | 18.6    | 17                       | 21/NR                                       |                |         |         |
|                                 |                                                         | Placebo                         | 44.9 (12.9)             | 68.4     | 17.2    | 17.6                     | 19.5/NR                                     |                |         |         |

\* The CARIMA trial included two placebo arms, each subsequently switched to secukinumab 300 mg or 150 mg at Week 12. Pooled results of the placebo groups were included in the NMA.

\*\* Assumed based on enrolment criteria (i.e., inclusion, exclusion criteria) regarding prior systemic therapies (e.g., anti-TNF).

Abbreviations: BID = twice daily; BIW = twice per week; BSA = body surface area; IGA = Investigator's Global Assessment; NAPS I = Nail Psoriasis Severity Index; NMA = network meta-analysis; NR = not reported; PASI = Psoriasis Area and Severity Index; PGA = Physician Global Assessment; PsA = psoriatic arthritis; Q2W = every 2 weeks; Q4W = every 4 weeks; Q8W = every 8 weeks; Q12W = every 12 weeks; QW = weekly; SAE = serious adverse event; SD = standard deviation; TNF = tumour necrosis factor.



Supplementary Table 7. Risk of Bias Assessment of Randomised Controlled Trials (Cochrane v.2.0)

| Trial          | Randomisation Process | Deviations from Intended Interventions | Missing Outcome Data | Measurement of the Outcome | Selection of the Reported Result | Overall Bias  |
|----------------|-----------------------|----------------------------------------|----------------------|----------------------------|----------------------------------|---------------|
| ALLURE         | Low                   | Low                                    | Low                  | Low                        | Low                              | Low           |
| AMAGINE 2      | Low                   | Low                                    | Low                  | Low                        | Low                              | Low           |
| AMAGINE 3      | Low                   | Low                                    | Low                  | Low                        | Low                              | Low           |
| BE RADIANT     | Low                   | Low                                    | Low                  | Low                        | Low                              | Low           |
| BE SURE        | Low                   | Low                                    | Low                  | Low                        | Low                              | Low           |
| BE VIVID       | Low                   | Low                                    | Low                  | Low                        | Low                              | Low           |
| CAIN457A2223   | Low                   | Low                                    | Low                  | Low                        | Low                              | Low           |
| CARIMA         | Low                   | Low                                    | High                 | Low                        | Low                              | High          |
| CLARITY        | Low                   | Low                                    | Low                  | Low                        | Low                              | Low           |
| CLEAR          | Low                   | Low                                    | Low                  | Low                        | Low                              | Low           |
| ECLIPSE        | Some concerns         | Low                                    | High                 | Low                        | Some concerns                    | High          |
| ERASURE        | Low                   | Low                                    | Low                  | Low                        | Low                              | Low           |
| EXPRESS        | Low                   | Low                                    | Some concerns        | Low                        | Low                              | Some concerns |
| EXPRESS-II     | Low                   | Low                                    | Some concerns        | Low                        | Low                              | Some concerns |
| FEATURE        | Low                   | Low                                    | Low                  | Low                        | Low                              | Low           |
| FIXTURE        | Low                   | Low                                    | Low                  | Low                        | Low                              | Low           |
| Igarashi, 2012 | Low                   | Low                                    | Some concerns        | Low                        | Low                              | Some concerns |
| IMMerge        | Low                   | Low                                    | Low                  | Low                        | Low                              | Low           |
| IXORA-S        | Low                   | Low                                    | Low                  | Low                        | Low                              | Low           |
| JUNCTURE       | Low                   | Low                                    | Low                  | Low                        | Low                              | Low           |
| LIBERATE       | Low                   | Low                                    | Low                  | Low                        | Low                              | Low           |
| M02-528        | Low                   | Low                                    | Low                  | Low                        | Low                              | Low           |
| MATURE         | Low                   | Low                                    | Low                  | Low                        | Low                              | Low           |
| Nakagawa, 2016 | Low                   | Low                                    | Low                  | Low                        | Low                              | Low           |
| Ohtsuki, 2017  | Low                   | Low                                    | Low                  | Low                        | Low                              | Low           |
| Ohtsuki, 2018  | Low                   | Low                                    | Low                  | Low                        | Low                              | Low           |
| Papp, 2021     | Low                   | Low                                    | Low                  | Low                        | Low                              | Low           |
| Seo, 2021      | Low                   | Low                                    | Low                  | Some concerns              | Low                              | Some concerns |
| SustalMM       | Some concerns         | Low                                    | Low                  | Low                        | Low                              | Some concerns |
| TRANSFIGURE    | Low                   | Low                                    | Low                  | Low                        | Low                              | Low           |
| Tyring, 2006   | Low                   | Low                                    | Low                  | Low                        | Low                              | Low           |
| UltIMMA-1      | Low                   | Low                                    | Low                  | Low                        | Low                              | Low           |
| UltIMMA-2      | Low                   | Low                                    | Low                  | Low                        | Low                              | Low           |
| UNCOVER 3      | Low                   | Low                                    | Low                  | Low                        | Low                              | Low           |
| UNVEIL         | Low                   | Low                                    | Some concerns        | Low                        | Low                              | Some concerns |
| VOYAGE 1       | Low                   | Low                                    | Low                  | Low                        | Low                              | Low           |

**Supplementary Table 8. Multinomial NMA for Achieving PASI 100 at Weeks 44–60 (Base-case, Active Treatment Only)**

| Treatment                   | Risk Ratio (95% CrI) for BKZ 320 mg Q4W/Q8W versus Comparators | Risk Ratio (95% CrI) for BKZ 320 mg Q4W/Q4W versus Comparators |
|-----------------------------|----------------------------------------------------------------|----------------------------------------------------------------|
| Bimekizumab 320 mg Q4W/Q8W* | Reference                                                      | 1.09 (0.95, 1.28)                                              |
| Bimekizumab 320 mg Q4W/Q4W  | 0.92 (0.78, 1.06)                                              | Reference                                                      |
| Brodalumab 210 mg           | 0.97 (0.79, 1.18)                                              | 1.06 (0.90, 1.25)                                              |
| Risankizumab 150 mg         | 0.90 (0.73, 1.07)                                              | 0.97 (0.83, 1.14)                                              |
| Ixekizumab 80 mg            | 1.26 (0.93, 1.81)                                              | 1.38 (1.03, 1.95)                                              |
| Guselkumab 100 mg           | 1.15 (0.90, 1.39)                                              | 1.25 (1.03, 1.49)                                              |
| Secukinumab 300 mg          | 1.52 (1.27, 1.83)                                              | 1.66 (1.42, 1.98)                                              |
| Ustekinumab 45 or 90 mg     | 1.99 (1.56, 2.55)                                              | 2.17 (1.75, 2.74)                                              |
| Secukinumab 150 mg          | 2.52 (1.92, 3.42)                                              | 2.74 (2.11, 3.75)                                              |
| Adalimumab 40 mg            | 2.34 (1.66, 3.14)                                              | 2.55 (1.89, 3.35)                                              |
| Etanercept 50 mg            | 5.09 (3.19, 8.94)                                              | 5.56 (3.50, 9.83)                                              |

Model: Random effects, REZ, multinomial NMA

\*Bimekizumab-treated patients were dosed 320 mg every 4 weeks through Week 16 and then switched to every 8 weeks maintenance dosing (Q4W/Q8W).

Abbreviations: BKZ = bimekizumab; CrI = credible interval; NMA = network meta-analysis; PASI 100 = achievement of 100% improvement from baseline in Psoriasis Area and Severity Index; Q4W = every 4 weeks; Q8W = every 8 weeks; REZ = random effects model combined with the parameter.

**Supplementary Table 9. Multinomial NMA at Weeks 44–60 – Probabilities of Achieving PASI Outcomes, Sensitivity Analysis (Treat-through, with Placebo)**

| Treatment                   | PASI 100 (95% CrI)   |
|-----------------------------|----------------------|
| Bimekizumab 320 mg Q4W/Q8W* | 0.591 (0.476, 0.697) |
| Bimekizumab 320 mg Q4W/Q4W  | 0.643 (0.555, 0.720) |
| Brodalumab 210 mg           | 0.599 (0.537, 0.665) |
| Risankizumab 150 mg         | 0.599 (0.534, 0.663) |
| Ixekizumab 80 mg            | 0.529 (0.431, 0.624) |
| Guselkumab 100 mg           | 0.491 (0.413, 0.567) |
| Secukinumab 300 mg          | 0.400 (0.362, 0.438) |
| Ustekinumab 90 mg           | 0.357 (0.179, 0.576) |
| Ustekinumab 45 or 90 mg     | 0.298 (0.258, 0.343) |
| Secukinumab 150 mg          | 0.250 (0.204, 0.299) |
| Adalimumab 40 mg            | 0.221 (0.154, 0.302) |
| Infliximab 5 mg/kg          | 0.188 (0.091, 0.328) |
| Etanercept 50 mg            | 0.111 (0.071, 0.164) |
| Apremilast 30 mg            | 0.080 (0.025, 0.199) |
| Placebo                     | 0.004 (0.002, 0.008) |

Model: Base case (treat-through, with placebo); random effects, baseline-adjusted, REZ, multinomial NMA.

\*Bimekizumab-treated patients were dosed 320 mg every 4 weeks through Week 16 and then switched to every 8 weeks dosing (Q4W/Q8W).

Abbreviations: CrI = credible interval; NMA = network meta-analysis; PASI 100 = achievement of 100% improvement from baseline in Psoriasis Area and Severity Index; Q4W = every 4 weeks; Q8W = every 8 weeks; REZ = random effects model combined with the parameter.

## Supplementary Figures

Supplementary Figure 1. Network Diagram for Trials Reporting SAEs

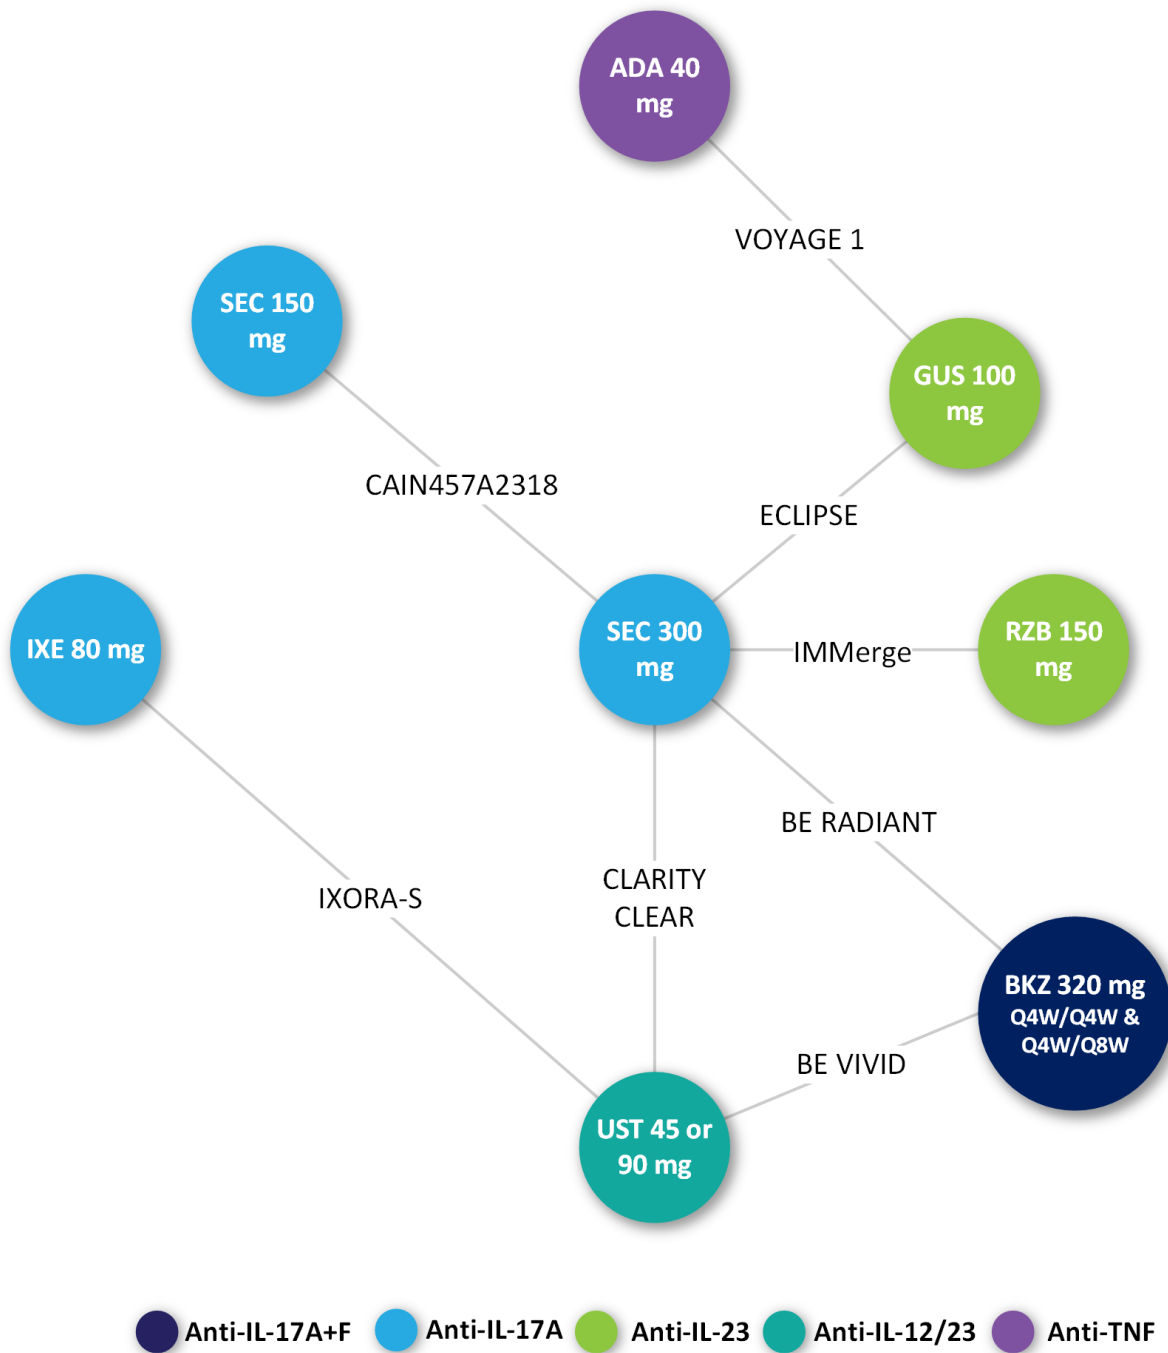

Number of studies included = 9.

Abbreviations: ADA = adalimumab; BKZ = bimekizumab; GUS = guselkumab; IL = interleukin; IXE = ixekizumab; Q4W = every 4 weeks; Q8W = every 8 weeks; RZB = risankizumab; SAE = serious adverse event; SEC = secukinumab; TNF = tumour necrosis factor; UST = ustekinumab.

Supplementary Figure 2. Network Diagram for Trials Reporting PASI Outcomes (Sensitivity Analysis: Treat-tough with Placebo)

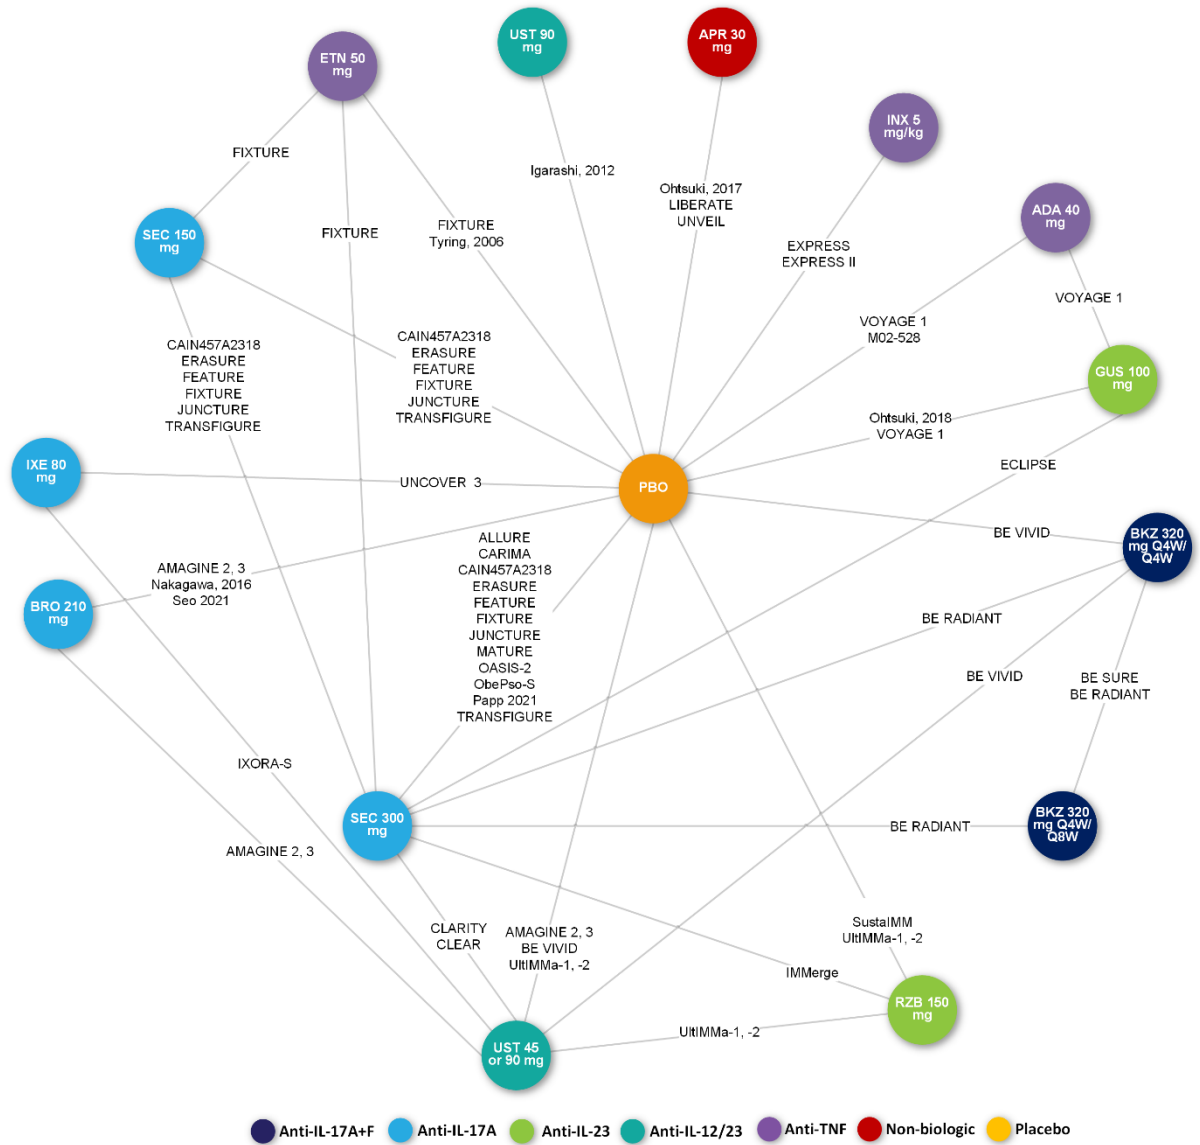

Number of studies included = 38.

Abbreviations: ADA = adalimumab; APR = apremilast; BKZ = bimekizumab; BRO = brodalumab; ETN = etanercept; GUS = guselkumab; IL = interleukin; INX = infliximab; IXE = ixekizumab; PASI = Psoriasis Area and Severity Index; PBO = placebo; Q4W = every 4 weeks; Q8W = every 8 weeks; RZB = risankizumab; SEC = secukinumab; TNF = tumour necrosis factor; UST = ustekinumab.

**Supplementary Figure 3. Multinomial NMA at Weeks 44–60 – Risk Ratios of Achieving PASI 100 (Sensitivity Analysis: Treat-through, with Placebo) between Bimekizumab 320 mg Q4W/Q8W\* and Other Treatments**

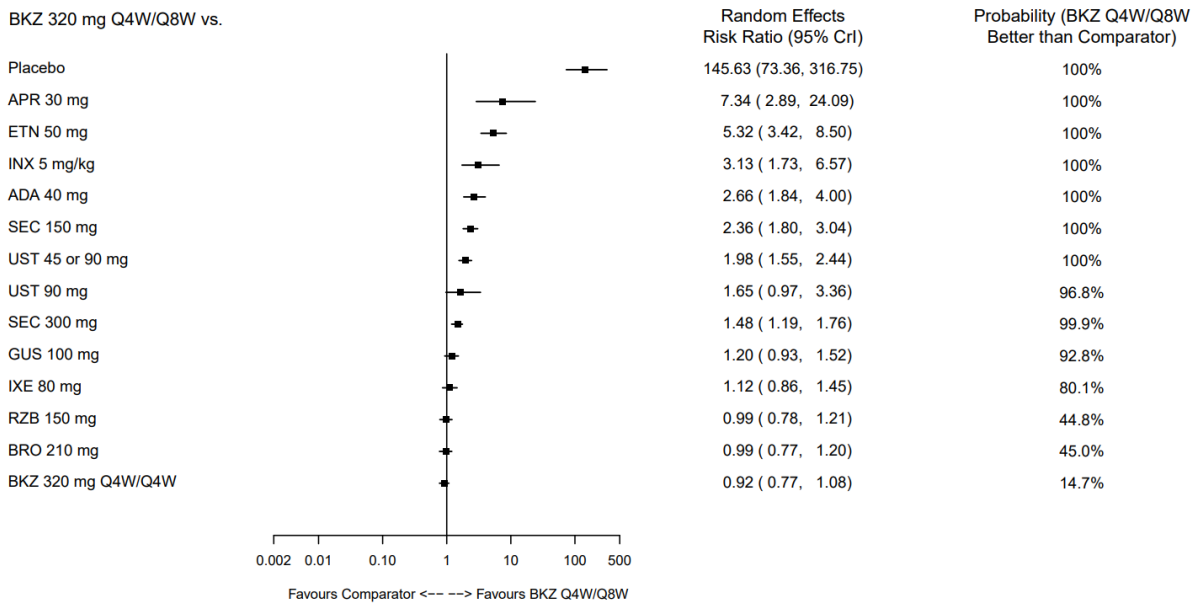

Model: Treat-through, with placebo; random effects, baseline-adjusted, REZ, multinomial NMA.

\*Bimekizumab-treated patients were dosed 320 mg every 4 weeks through Week 16 and then switched to every 8 weeks dosing (Q4W/Q8W).

Abbreviations: ADA = adalimumab; APR = apremilast; BKZ = bimekizumab; BRO = brodalumab; CrI = credible interval; ETN = etanercept; GUS = guselkumab; INX = infliximab; IXE = ixekizumab; NMA = network meta-analysis; PASI 100 = achievement of 100% improvement from baseline in Psoriasis Area and Severity Index; Q4W = every 4 weeks; Q8W = every 8 weeks; REZ = random effects model combined with the parameter z; RZB = risankizumab; SEC = secukinumab; UST = ustekinumab.
